# Supplementary material for: Three-Dimensionally Ordered Macro/Mesoporous Nb2O5/Nb4N5 Heterostructure as Sulfur Host for High-Performance Lithium/Sulfur Batteries
Source: MDPI journal article supplement (doi:10.3390/nano11061531), 2021-06-10
Supplement: s1 [file s1]

## *Supplementary Materials*

# **Three-Dimensionally Ordered Macro/Mesoporous Nb<sub>2</sub>O<sub>5</sub>/Nb<sub>4</sub>N<sub>5</sub> Heterostructure as Sulfur Host for High-Performance Lithium/Sulfur Batteries**

**Haoxian Chen <sup>1,†</sup>, Jiayi Wang <sup>2,†</sup>, Yan Zhao <sup>3,\*</sup>, Qindan Zeng <sup>1</sup>, Guofu Zhou <sup>1</sup> and Mingliang Jin <sup>1,\*</sup>**

<sup>1</sup> National Center for International Research on Green Optoelectronics, South China Academy of Advanced Optoelectronics, South China Normal University, Guangzhou 510006, China; haoxian.chen@ecs-scnu.org (H.C.); qin-dan.zeng@ecs-scnu.org (Q.Z.); guofu.zhou@m.scnu.edu.cn (G.Z.)

<sup>2</sup> School of Information and Optoelectronic Science and Engineering, South China Normal University, Guangzhou 510006, China; jiayi.wang@zq-scnu.org

<sup>3</sup> School of Materials Science and Engineering, Hebei University of Technology, Tianjin 300130, China

\* Correspondence: yanzhao1984@hebut.edu.cn (Y.Z.); mingliang.jin@zq-scnu.org (M.J.)

† H. Chen and J. Wang contributed equally to this work.

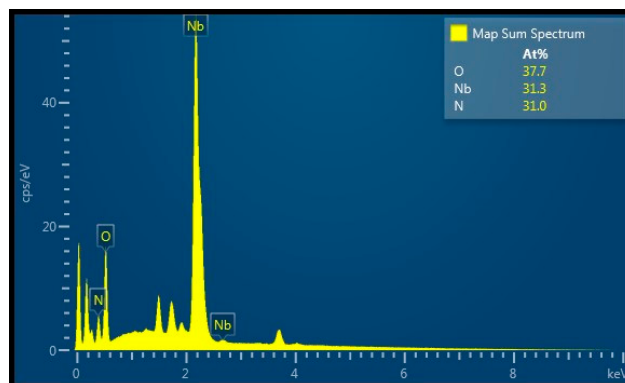

**Figure S1.** EDS mapping of Nb<sub>2</sub>O<sub>5</sub>/Nb<sub>4</sub>N<sub>5</sub>

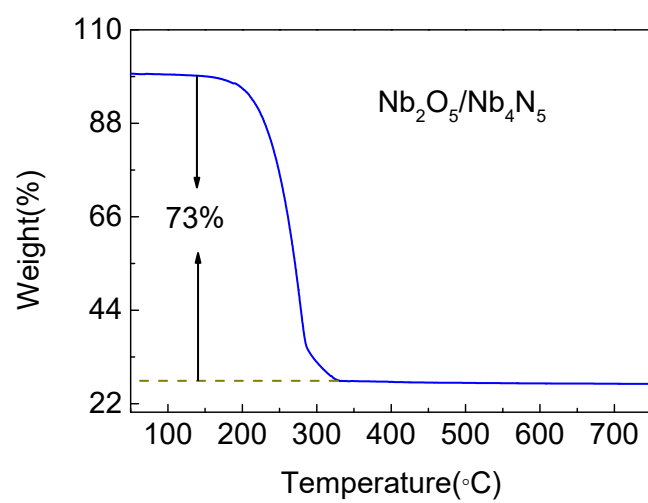

**Figure S2.** TGA profile of  $\text{Nb}_2\text{O}_5/\text{Nb}_4\text{N}_5$

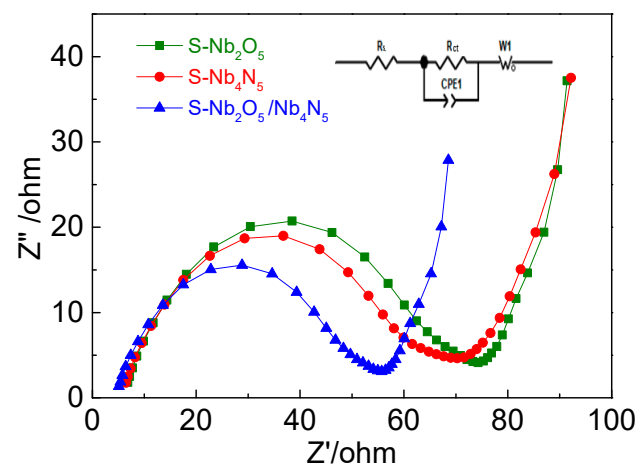

**Figure S3.** Nyquist plots of S-Nb<sub>4</sub>N<sub>5</sub>, S-Nb<sub>2</sub>O<sub>5</sub>/Nb<sub>4</sub>N<sub>5</sub> and S-Nb<sub>2</sub>O<sub>5</sub>

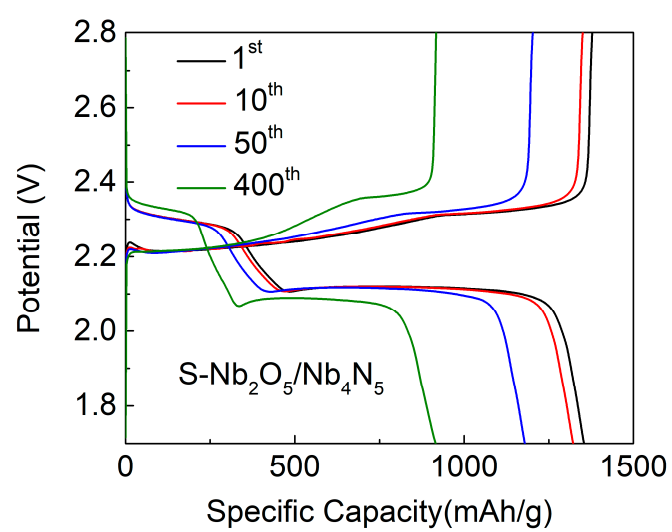

**Figure S4.** Voltage profiles of S-Nb<sub>2</sub>O<sub>5</sub>/Nb<sub>4</sub>N<sub>5</sub> at 1 C

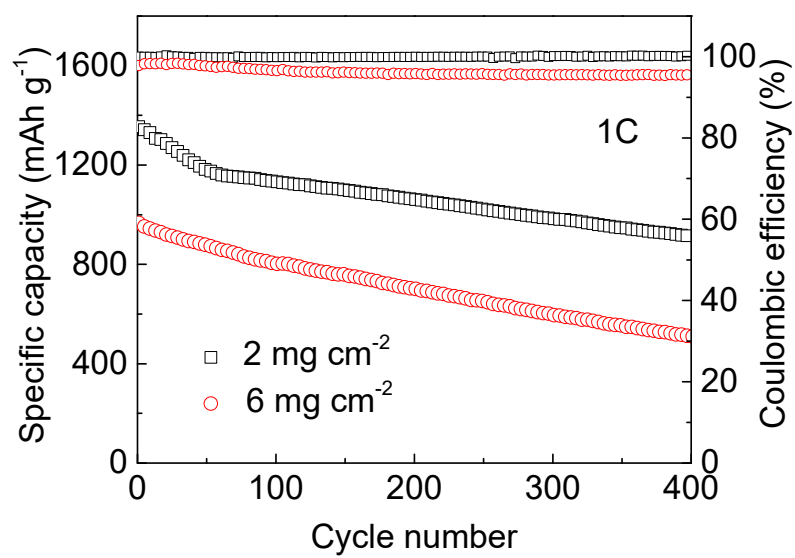

**Figure S5.** Cycling tests at 1 C with different mass loading

**Table S1.** Conductivities of Nb<sub>4</sub>N<sub>5</sub>, Nb<sub>2</sub>O<sub>5</sub>/Nb<sub>4</sub>N<sub>5</sub> and Nb<sub>2</sub>O<sub>5</sub>

| Sample                                                         | Conductivity                             |
|----------------------------------------------------------------|------------------------------------------|
| Nb <sub>4</sub> N <sub>5</sub>                                 | 6.6×10 <sup>-3</sup> S cm <sup>-1</sup>  |
| Nb <sub>2</sub> O <sub>5</sub> /Nb <sub>4</sub> N <sub>5</sub> | 4.35×10 <sup>-4</sup> S cm <sup>-1</sup> |
| Nb <sub>2</sub> O <sub>5</sub>                                 | 6.91×10 <sup>-6</sup> S cm <sup>-1</sup> |

**Table S2.** The resistance of Rs and Rct simulated from equivalent circuits

| Sample                                                         | Rs            | Rct            |
|----------------------------------------------------------------|---------------|----------------|
| Nb <sub>2</sub> O <sub>5</sub> /Nb <sub>4</sub> N <sub>5</sub> | 4.48 $\Omega$ | 46.79 $\Omega$ |
| Nb <sub>4</sub> N <sub>5</sub>                                 | 5.64 $\Omega$ | 57.55 $\Omega$ |
| Nb <sub>2</sub> O <sub>5</sub>                                 | 5.97 $\Omega$ | 62.38 $\Omega$ |



**Table S3.** Pore size distribution and/or pore volume of Nb<sub>4</sub>N<sub>5</sub>, Nb<sub>2</sub>O<sub>5</sub>/Nb<sub>4</sub>N<sub>5</sub> and Nb<sub>2</sub>O<sub>5</sub>

| Sample                                                         | Pore size distribution | Pore volume             |
|----------------------------------------------------------------|------------------------|-------------------------|
| Nb <sub>2</sub> O <sub>5</sub> /Nb <sub>4</sub> N <sub>5</sub> | 2.7 nm                 | 0.16 cm <sup>3</sup> /g |
| Nb <sub>4</sub> N <sub>5</sub>                                 | 2.1 nm                 | 0.08 cm <sup>3</sup> /g |
| Nb <sub>2</sub> O <sub>5</sub>                                 | 3.8, 14.2 nm           | 0.05 cm <sup>3</sup> /g |

**Table S4.** Comparison of electrochemical properties of our work with other works

| Materials                                                      | Rate / Specific<br>capacity/Cycle<br>(C)/ (mAh g <sup>-1</sup> ) | Reference                                |
|----------------------------------------------------------------|------------------------------------------------------------------|------------------------------------------|
| Ag/VN@Co/NCNT                                                  | 2/693/2000                                                       | ACS Nano 2021, 15, 4, 6849-6860          |
| Co <sub>9</sub> S <sub>8</sub> @MoS <sub>2</sub> /CNF          | 1/803/400                                                        | ACS Nano 2020, 14,12,17285-17294         |
| V <sub>8</sub> C <sub>7</sub> -VO <sub>2</sub>                 | 4/410/800                                                        | Adv. Mater. 2020, 32, 50, 2005967        |
| TiO <sub>2</sub> -Ni <sub>3</sub> S <sub>2</sub>               | 0.5/638/900                                                      | Adv. Mater. 2020, 32, 32, 2000315        |
| TiO <sub>2</sub> -TiN                                          | 1/2000/704                                                       | Energy Environ. Sci., 2017,10, 1694-1703 |
| Co <sub>9</sub> S <sub>8</sub> /CoO                            | 1/601/1000                                                       | Nano Energy 2019, 60, 332-339            |
| MoSe <sub>2</sub> /MoO <sub>2</sub>                            | 0.5/848/500                                                      | Chem. Eng. J. 2020,381, 122672           |
| Nb <sub>2</sub> O <sub>5</sub> /Nb <sub>4</sub> N <sub>5</sub> | 1/913/400                                                        | Our work                                 |
